# Supplementary material for: A Serial Mediation Model of Insecure Attachment and Psychological Distress: The Role of Dispositional Shame and Shame-Coping Styles
Source: Int J Environ Res Public Health. 2023 Feb 11;20(4):3193. doi: 10.3390/ijerph20043193 (PMC9966328; doi:10.3390/ijerph20043193)
Supplement: Supplementary file 1 [file ijerph-20-03193-s001.zip › ijerph-2146195-supplementary.pdf]

## Supplementary Material

**Table S1.**

*Skewness and kurtosis for all measures used in the study (N = 978)*

| Variables | Skweness | Kurtosis |
|-----------|----------|----------|
| ASQ ANX   | 0.322    | 0.183    |
| ASQ AVD   | 0.195    | −0.098   |
| ESS       | 0.745    | 0.182    |
| CoSS AO   | 0.669    | 0.246    |
| CoSS AS   | 0.345    | −0.427   |
| CoSS WD   | 0.466    | −0.253   |
| CoSS AV   | 0.143    | 0.011    |
| K10       | 0.688    | −0.027   |

*Note.* ASQ = Attachment Style Questionnaire; ANX = attachment anxiety; AVD = attachment avoidance; ESS = Experience of Shame Scale; CoSS = Compass of Shame Scale; AO = attack others; AS = attack self; WD = withdrawal; AV = avoidance; K10 = Kessler Psychological Distress Scale.

**Table S2.**

*Means, Standard Deviations (SD) and zero-order correlations between all measures used in the study (Men N = 421)*

| Variables (Men) | Mean (SD)     | 1        | 2       | 3      | 4       | 5       | 6       | 7       | 8       | 9       | 10      | 11 |
|-----------------|---------------|----------|---------|--------|---------|---------|---------|---------|---------|---------|---------|----|
| 1. Age          | 33.72 (14.23) | -        |         |        |         |         |         |         |         |         |         |    |
| 2. Education    |               | -0.083   | -       |        |         |         |         |         |         |         |         |    |
| 3. Job Status   |               | -0.184** | 0.043   | -      |         |         |         |         |         |         |         |    |
| 4. ASQ ANX      | 45.63 (11.87) | -0.143** | 0.037   | 0.027  | -       |         |         |         |         |         |         |    |
| 5. ASQ AVD      | 51.96 (10.68) | -0.071   | -0.061  | 0.013  | 0.445** | -       |         |         |         |         |         |    |
| 6. ESS          | 42.66 (13.27) | -0.292** | 0.125*  | 0.054  | 0.601** | 0.358** | -       |         |         |         |         |    |
| 7. CoSS AO      | 10.35 (7.24)  | -0.151** | 0.081   | -0.032 | 0.474** | 0.365** | 0.538** | -       |         |         |         |    |
| 8. CoSS AS      | 16.68 (10.06) | -0.240** | 0.115*  | 0.060  | 0.614** | 0.350** | 0.661** | 0.558** | -       |         |         |    |
| 9. CoSS WD      | 12.90 (9.26)  | -0.182** | 0.119*  | 0.028  | 0.617** | 0.379** | 0.658** | 0.662** | 0.728** | -       |         |    |
| 10. CoSS AV     | 16.35 (7.77)  | -0.210** | 0.058   | -0.016 | 0.340** | 0.319** | 0.427** | 0.602** | 0.526** | 0.503** | -       |    |
| 11. K10         | 20.32 (7.09)  | -0.208** | 0.133** | 0.031  | 0.513** | 0.368** | 0.628** | 0.406** | 0.528** | 0.520** | 0.283** | -  |

*Note.* Education was coded 0 = high-school degree, 1 = bachelors' degree and above. Job status was coded 1 = employed, 0 = other. SD = Standard Deviation; ASQ = Attachment Style Questionnaire; ANX = attachment anxiety; AVD = attachment avoidance; ESS = Experience of Shame Scale; CoSS = Compass of Shame Scale; AO = attack other; AS = attack self; WD = withdrawal; AV = avoidance; K10 = Kessler Psychological Distress Scale. \*  $p < 0.01$ . \*\*  $p < 0.001$

**Table S3.**

*Means, Standard Deviations (SD) and zero-order correlations between all measures used in the study (Women N = 557)*

| Variables (Women) | Mean (SD)     | 1        | 2      | 3      | 4       | 5       | 6       | 7       | 8       | 9       | 10      | 11 |
|-------------------|---------------|----------|--------|--------|---------|---------|---------|---------|---------|---------|---------|----|
| 1. Age            | 31.00 (12.78) | -        |        |        |         |         |         |         |         |         |         |    |
| 2. Education      |               | -0.275** | -      |        |         |         |         |         |         |         |         |    |
| 3. Job Status     |               | -0.123** | -0.019 | -      |         |         |         |         |         |         |         |    |
| 4. ASQ ANX        | 48.94 (12.23) | -0.223** | 0.039  | 0.054  | -       |         |         |         |         |         |         |    |
| 5. ASQ AVD        | 50.70 (10.76) | 0.033    | -0.036 | 0.017  | 0.332** | -       |         |         |         |         |         |    |
| 6. ESS            | 48.27 (14.10) | -0.290** | 0.073  | 0.012  | 0.646** | 0.269** | -       |         |         |         |         |    |
| 7. CoSS AO        | 12.32 (7.30)  | -0.101*  | 0.070  | 0.001  | 0.501** | 0.290** | 0.475** | -       |         |         |         |    |
| 8. CoSS AS        | 21.01 (9.97)  | -0.229** | 0.096* | 0.071  | 0.563** | 0.186** | 0.630** | 0.489** | -       |         |         |    |
| 9. CoSS WD        | 17.37 (9.29)  | -0.159** | 0.006  | 0.039  | 0.575** | 0.298** | 0.616** | 0.628** | 0.720** | -       |         |    |
| 10. CoSS AV       | 17.11 (6.65)  | -0.184** | 0.000  | 0.087* | 0.210** | 0.256** | 0.286** | 0.427** | 0.311** | 0.379** | -       |    |
| 11. K10           | 22.41 (7.57)  | -0.101*  | -0.014 | 0.059  | 0.570** | 0.279** | 0.633** | 0.384** | 0.536** | 0.513** | 0.156** | -  |

*Note.* Education was coded 0 = high-school degree, 1 = bachelors' degree and above. Job status was coded 1 = employed, 0 = other. SD = Standard Deviation; ASQ = Attachment Style Questionnaire; ANX = attachment anxiety; AVD = attachment avoidance; ESS = Experience of Shame Scale; CoSS = Compass of Shame Scale; AO = attack other; AS = attack self; WD = withdrawal; AV = avoidance; K10 = Kessler Psychological Distress Scale. \*  $p < 0.01$ . \*\*  $p < 0.001$

**Table S4***Fit Indices for Measurement Invariance Tests of the Hypothesized Model Among Men and Women*

| Model            | $\chi^2$ | <i>df</i> | <i>p</i> | CFI   | TLI   | RMSEA (90%CI)       | SRMR  | $\Delta$ CFI |
|------------------|----------|-----------|----------|-------|-------|---------------------|-------|--------------|
| 1. Unconstrained | 40.322   | 12        | 0.0001   | 0.992 | 0.953 | 0.069 (0.047 0.094) | 0.024 |              |
| 2. Constrained   | 91.659   | 42        | 0.0000   | 0.986 | 0.976 | 0.049 (0.035 0.063) | 0.053 | 0.006        |

*Note.* The following fit indexes are reported:  $\chi^2$ =chi square; df=degrees of freedom; CFI=Comparative-fit-index; TLI=Tucker-Lewis-index; SRMR=Standardized-Root-Mean-Square-Residual; MC=model comparison;  $\Delta$ CFI= CFI difference test.
